# Supplementary material for: Ependymoma group-specific blood-brain barrier differences uncovered by a multi-omics approach
Source: Sci Rep. 2026 Apr 10;16:12061. doi: 10.1038/s41598-026-47499-2 (PMC13070042; doi:10.1038/s41598-026-47499-2)
Supplement: Supplementary file 1 — Supplementary Material 1 [file 41598_2026_47499_MOESM1_ESM.xlsx]

## Sheet: Table S1
Table S1 : List of tight junction and efflux pump genes based on (3, 7, 53-58).
Tight junctions	Transporter/Receptor
Af-6	ABCA1
CDH5	ABCA12
CGNL1	ABCA2
Cingulin	ABCA4
CLDN1	ABCB1
CLDN11	ABCB6
CLDN12	ABCB8
CLDN25	ABCC1
CLDN3	ABCC2
CLDN5	ABCC3
CLDN27	ABCC3
DSP	ABCC4
ESAM	ABCC5
HEG1	ABCC6
JAM-1	ABCC8
JAM-2	ABCC9
JAM-3	ABCD1
LSR	ABCG2
MARVELD2	AGER
N-cadherin	APOE
Nectin3	ATP10A
OCLN	ATP10D
Par3	ATP13A3
PECAM-1	ATP7A
TJP1	INSR
TJP2	LEPR
TJP3	MFSD2A
	SLC12A2
	SLC12A8
	SLC16A1
	SLC16A10
	SLC16A2
	SLC16A4
	SLC16A6
	SLC16A9
	SLC19A3
	SLC1A1
	SLC1A4
	SLC22A17
	SLC22A3
	SLC22A5
	SLC22A8
	SLC25A25
	SLC25A27
	SLC25A39
	SLC25A4
	SLC25A53
	SLC26A10
	SLC26A6
	SLC27A1
	SLC28A1
	SLC28A2
	SLC29A1
	SLC29A4
	SLC2A1
	SLC30A1
	SLC35E4
	SLC36A1
	SLC38A2
	SLC38A5
	SLC43A2
	SLC43A3
	SLC44A1
	SLC45A4
	SLC47A2
	SLC52A1
	SLC52A2
	SLC59A1
	SLC5A6
	SLC6A6
	SLC6A8
	SLC6A9
	SLC7A1
	SLC7A3
	SLC7A5
	SLC9A2
	SLC9A5
	SLC9A8
	SLCO1A2
	SLCO1B1
	SLCO1C1
	SLCO2A1
	SLCO2B1
	TFRC

## Sheet: Table S2
Table S2: All LFQ values in log2 of tight junctions and transporters from ependymoma patients and healthy control
Gene.names	LFQ.intensity.06_QE1_TM_EPN_Healthy_12411FFC_9	LFQ.intensity.06_QE1_TM_EPN_Healthy_12411FGrMed_10	LFQ.intensity.06_QE1_TM_EPN_Healthy_13846FGR_6	LFQ.intensity.06_QE1_TM_EPN_Healthy_14409MFC_8	LFQ.intensity.06_QE1_TM_EPN_Healthy_14409MGR_7	LFQ.intensity.06_QE1_TM_EPN_R2_11EP7	LFQ.intensity.06_QE1_TM_EPN_R2_13EP12	LFQ.intensity.06_QE1_TM_EPN_R2_13EP14	LFQ.intensity.06_QE1_TM_EPN_R2_13EP18	LFQ.intensity.06_QE1_TM_EPN_R2_13EP8	LFQ.intensity.06_QE1_TM_EPN_R2_13EP9	LFQ.intensity.06_QE1_TM_EPN_R2_3EP15	LFQ.intensity.06_QE1_TM_EPN_R2_3EP18	LFQ.intensity.06_QE1_TM_EPN_R2_3EP22	LFQ.intensity.06_QE1_TM_EPN_R2_3EP26	LFQ.intensity.06_QE1_TM_EPN_R2_3EP55	LFQ.intensity.06_QE1_TM_EPN_R2_3EP7_5	LFQ.intensity.06_QE1_TM_EPN_R2_3EP73	LFQ.intensity.06_QE1_TM_EPN_R2_3EP74	LFQ.intensity.06_QE1_TM_EPN_R2_3EP9	LFQ.intensity.06_QE1_TM_EPN_R2_4EP24	LFQ.intensity.06_QE1_TM_EPN_R2_7EP1_2	LFQ.intensity.06_QE1_TM_EPN_R2_7EP18	LFQ.intensity.06_QE1_TM_EPN_R2_7EP19	LFQ.intensity.06_QE1_TM_EPN_R2_7EP49_3	LFQ.intensity.06_QE1_TM_EPN_R2_9EP33_1	LFQ.intensity.06_QE1_TM_EPN_YAP_11EP21_14	LFQ.intensity.06_QE1_TM_EPN_YAP_3EP29_13	LFQ.intensity.06_QE1_TM_EPN_YAP_4EP46_12	LFQ.intensity.06_QE1_TM_EPN_YAP_9EP45_11	LFQ.intensity.11_QE1_TM_EPN_R2_11EP32	LFQ.intensity.11_QE1_TM_EPN_R2_3EP2	LFQ.intensity.11_QE1_TM_EPN_R2_3EP49	LFQ.intensity.11_QE1_TM_EPN_R2_3EP54	LFQ.intensity.11_QE1_TM_EPN_R2_3EP67	LFQ.intensity.11_QE1_TM_EPN_R2_3EP7	LFQ.intensity.11_QE1_TM_EPN_R2_4EP26	LFQ.intensity.11_QE1_TM_EPN_R2_4EP3	LFQ.intensity.11_QE1_TM_EPN_R2_4EP32	LFQ.intensity.11_QE1_TM_EPN_R2_4EP35	LFQ.intensity.11_QE1_TM_EPN_R2_7EP11	LFQ.intensity.11_QE1_TM_EPN_R2_7EP15	LFQ.intensity.11_QE1_TM_EPN_R2_7EP22	LFQ.intensity.11_QE1_TM_EPN_R2_7EP26	LFQ.intensity.11_QE1_TM_EPN_R2_7EP3	LFQ.intensity.11_QE1_TM_EPN_R2_7EP32	LFQ.intensity.11_QE1_TM_EPN_R2_7EP4	LFQ.intensity.11_QE1_TM_EPN_R2_7EP48	LFQ.intensity.11_QE1_TM_EPN_R2_7EP49
	Healthy	Healthy	Healthy	Healthy	Healthy	PF_SE	PF_SE	PF_SE	PF_SE	PF_SE	PF_SE	PFA	PFA	PFA	PFA	PFA	PFB	PFA	PFA	PFA	PFA	ZFTA	PFA	PF_SE	PFB	PFA	YAP1	YAP1	YAP1	YAP1	PFA	PFB	PFB	ZFTA	ZFTA	PFB	PFB	PFB	PFB	PFB	PFA	PFB	PFB	PFA	PFA	PFA	PFA	PFA	PFB
CLDN5										23.6427																									26.6606
ABCC3																												21.1431
ABCC4			23.7668			25.5287	25.9262	23.5795	23.8912		25.7354	26.405	25.3031	25.2637	25.28	25.2313	22.9591	26.5042	26.0802	24.6793	24.645	24.2391	24.753	24.5059		25.979	23.4415	25.6697	25.5011	24.3983	26.2929		26.3515	26.0772	26.6877	24.8285	26.0654	26.2652	27.0179	25.6001	24.4208	27.1473	26.8419	24.0906	25.7386	24.2	25.853	26.0859	26.1188
ABCC9																													27.1431						23.8559								22.1938
CLDN11	23.5393		24.6919		23.2772																					23.4618				23.4679
SLC22A3			25.0102			26.8876	27.254	27.5735	27.4779	24.9216	27.2261	25.9553	26.1726	26.3276	25.3931	26.0526	22.9282		27.1537	27.0392	26.5718	23.8102		27.3324	23.3831	25.8104	25.0328	25.2094	24.0886	24.7471	26.433		23.8474		24.9446	24.5253	26.2181	26.5038	26.2832	24.8997	26.1192	26.9791	26.0925	27.4727	26.5871	26.9627	26.487	27.247	25.6386
ABCA1	26.0997	26.0093	26.2106	26.4436	25.8054			26.1431				28.2659	25.7385		24.9947	26.4076	24.3026		26.8534			24.7772	25.6371		24.7825		25.1417	26.1275				26.4518	25.7754	28.7407		26.2914			25.4421					26.2963	25.147			27.463	26.4532
SLC25A27																																						22.212
APOE	27.8377	28.0814	30.4734	26.2286	28.9828	30.0383	29.5131	30.1438	30.7105	31.6326	28.872	29.7423	28.2678	28.5333	31.739	28.444	28.3194	27.9953	28.6022	29.1807	29.0913	30.7535	28.9348	27.7783	29.4818	29.379	28.3927	28.5042	29.8898	28.0977	29.6614	29.1762	27.8105	29.245	29.2302	26.9596	27.5866	26.2626	28.1687	26.6242	29.4154	26.975	26.7161	30.0686	29.0233	30.0235	29.5997	29.7631	26.407
TFRC	27.0433	26.5766	27.8031	27.4927	27.4712	25.0578	26.1389	25.1412	26.2081		26.7979	27.5893	25.0625	23.8307	24.8912	26.9579	27.1013	25.6531	26.7784	26.1111	26.1196	25.169	26.5083	26.0041	27.0281	27.3957	26.883	25.7845	23.7476	28.3521	27.2837		26.5206	29.6319	23.3623	26.8439				24.7734	24.1798	26.3674	23.9686	26.7581	25.4338	25.5295	26.6893	27.2164	23.9704
INSR	27.376	27.9882	26.9144	25.5762	25.98		25.1475	26.2833			25.1459	26.367	26.633		27.3922	26.678		27.7574		25.3643	27.3455			28.5381						27.5926				26.2073		25.4814	27.4497					28.1911	25.8377			26.1555	27.0344	27.3477
ABCB1						24.3958	24.0417	22.7554	23.9467			23.9753	23.7055	24.3563		24.3531		24.8952	24.0856		24.588	23.9578		23.5365		24.4507			24.0264	24.0084			23.4855	24.8452					25.2894			22.7849	24.0674			25.1147	24.5612		23.4178
SLC2A1	27.6697	26.0884	29.382	27.4715	27.4982	28.2725	28.1689	29.4987	27.9307	31.4998	27.0078	29.7138	28.3404	28.5138	31.0824	29.3666	27.0161	28.6792	28.0128	28.2281	28.8868	27.4143	27.8719	28.3855	28.2853	27.1961	27.6574	27.7794	28.8854	28.0955	26.8656	29.8477	28.456	30.1724	30.6754	26.7676	28.0777	27.7382	28.1304	27.018	27.8815	28.612	28.0147	29.4814	29.0363	29.0587	27.8482	27.8672	28.2702
SLC25A4	27.5949	28.8415	27.6784	28.1026	28.8158	28.3287	29.2305	27.5371	28.6755	25.3906	28.5171	27.3103	28.0795	28.1853	23.8976	27.3233	30.4702	27.1353	28.0715	28.0273	27.865	28.4605	28.0505	28.5088	29.9695	28.214	29.0213	29.3432	27.6505	28.3661	28.2843	27.5035	28.6233	26.3221	26.1675	30.0531	28.5703	28.4944	27.9268	28.8893	28.6064	27.5678	27.333	27.8964	27.5014	28.6795	28.1191	27.9696	29.0493
DSP	28.3945	29.1598	30.705	27.68	28.4161	30.8271	29.8026	30.1652	29.7094	32.6828	27.5945	30.4421	29.8248	30.6949	32.2944	28.5782	29.9237	31.3112	29.6295	30.0334	30.6535	29.1221	29.9369	29.9604	29.0899	29.4052	29.7638	29.0317	29.2812	30.0383	28.9776	31.882	30.7644	32.0315	29.1291	29.9859	28.8449	29.1887	30.1418	28.157	28.9285	29.9208	30.2792	30.957	29.8836	30.1954	29.5291	28.8911	29.452
PECAM1		24.7497	24.6423				23.8723			25.9876												24.1964		24.5572					25.0694								25.3772										23.9193	23.9956
CDH2	30.342	29.3989	29.4125	30.1813	29.8555	30.1581	30.5997	29.7045	30.7351	29.0353	30.4431	29.0982	30.5262	30.4402	28.5056	30.3537	30.6577	29.9967	30.5191	30.3221	30.8804	30.0221	30.3048	30.5808	30.1551	30.3412	31.2033	30.6394	30.2373	30.928	30.049	30.5942	30.5601	28.253	28.9252	30.4603	31.0398	30.7641	30.258	30.241	30.6182	30.4526	30.8983	29.8245	29.8493	30.1478	30.5163	29.8721	30.2384
SLC7A1	24.8524	24.0874	24.5706	23.8916	24.5442		24.6445		23.196		24.5499							23.2686	24.7631		24.7042	24.0303			24.6239	25.0324			25.0279	23.5546	24.8968		22.5758	24.1639								24.992		23.3839	24.8823	24.3838	25.0431	24.5421
CDH5			25.2452		24.4959						24.4769																												24.7657	22.8087							23.2966
ABCC1	26.0965	26.6869	27.1029	26.8307	26.9048	26.7188	26.5186		26.8599			26.3082	27.4876	27.1838		25.8474	26.7915	28.4598	26.9859	25.9651	25.1483	24.48	26.8851	25.1373	27.0936	23.6162	25.9002	25.2456	25.8459	25.18	24.9507	26.0889	24.9384			27.0119	27.8444	27.3344	28.1143	28.7264	26.6716	28.12	27.1109	27.2873		27.1828	27.0902	26.8085	28.5279
ABCD1			24.6983	25.4507	24.1858		24.3838													21.1877		24.5388				24.327			23.8954		24.6716			26.222				23.5623		24.0947						25.2424
SLC16A2			24.957			26.7638	27.8469	25.5451	27.1548		26.637	24.8938	26.9118	26.0407		25.9524	25.7255	25.2948	26.9554	27.1745	27.756	24.8337	25.6577	26.4202	24.94	28.5566	27.0532	24.7645	26.7286	25.9131	25.354	28.9663	26.6415			25.4979	26.7039	27.8944	25.5534	25.9763	27.08	26.9417	25.3879	27.2363	25.9013	27.1824	28.1087	28.0178	25.2339
SLC1A1		25.4143					27.0783						25.7253	26.3222		25.685								25.6613						23.0653		26.646	25.7581	24.7675			25.2899	25.6864	24.7898	25.2356				26.8674	25.4968				24.651
SLC1A4	24.9708	24.3639	23.3017	24.3725	25.3926	24.7659	24.6151	24.7046	23.3153		23.2567	24.162	25.4518	24.9884	24.6549	24.2879	25.2486	24.797	25.6553	24.2768	24.8528	25.4819	25.4614		25.5191	25.3968	25.0331	24.3623	24.9018	23.3476	25.4086	24.4646	24.6096		25.9945	25.5342	26.1234	25.2869	23.407	24.1359	25.8931	23.3127	24.0669	24.3699	25.9865	24.9369	26.4459	25.2014	25.2631
SLC6A9					24.2916	25.5167	24.2031		24.8897				24.3224	24.7809		24.2359	24.3339	24.6716	25.7604	25.2449		23.718			24.0647	25.2246				24.1598			24.702				25.0685	23.9091			24.6628		24.2102		25.1766	24.3199	25.2379	25.0763
SLC16A1	27.9387	26.4662	28.1877	28.1644	27.5684	29.2811	30.6834	30.3914	30.3303	29.4705	30.3056	29.6887	30.6089	29.3803		30.0571	28.7179	29.7174	29.6977	28.7214	29.2609	28.1602	30.1495	31.0237	28.5708	28.9766	31.0618	29.9839	30.3542	30.1605	29.7421	29.9337	29.4855	28.5295	28.4433	28.7237	30.5354	29.8306	29.7232	30.043	30.186	29.997	27.9867	28.5754	29.6011	29.1394	29.5837	29.2257	29.8551
SLC12A2	26.5427	24.9891	26.7234	24.7592	23.6389		23.3489			25.4695	24.8878	24.8059	25.8432	24.9737				24.2498	26.0934	24.051		26.3254	25.4619		22.8726	25.5138	24.9331		24.3905					27.1709	24.9188			24.2444	24.259	26.3995	25.2348	24.2937	24.1676		26.5693	23.8031	25.3543	25.6523
MLLT4	30.6686	30.0552	28.9274	30.4646	29.7388	25.4353	26.4844		24.1135	26.1958	26.5459	26.3462	27.6811	27.5412	24.6031	24.8158	28.5527	28.7152	28.2908	28.6472	27.0398	26.75	27.2822		27.4479	27.4469	27.55	24.2806	25.9931	27.644	25.7521	26.7474	27.1943	24.2741	26.889	28.2433	24.0266	28.7105	28.4482	29.1143	28.1197	22.2504	28.2338	25.0994	28.1607	27.4969	27.5606	27.4784	27.2041
CLDN12
JAM2	25.2099		23.6047		24.4558	25.1578	27.8161	27.1067	26.9171	24.7976	26.5072		26.7048	26.4986		23.4521	25.3335	24.9201	25.9244	25.6919	26.2951	23.3229		27.4812		26.0246	27.3903	26.3015	26.5838	26.0762	25.2069		24.0463		24.479	23.184	26.3959	23.8384			26.6154	27.0564		26.2526	25.1406	26.9317	26.6732	26.1638
SLC7A5	27.6092	28.4373	28.1903	27.8256	28.633	30.3823	31.2323	32.0311	31.4708	25.9202	31.6271	28.7584	28.79	29.0924		28.8199	25.6436	29.7428	29.1486	27.2726	29.06	26.6417	26.2968	31.3799	26.5183	29.2738	26.4772	26.6721	27.7873	28.3048	28.7562	25.6055	28.6655	26.9673	24.3074	26.0328	31.879	29.1444	28.9473	28.5469	28.7002	31.065	27.1251	28.7356	29.7837	29.6395	29.8433	29.3011	28.0544
ATP7A																																								24.3266			26.5796					24.5137
TJP1	28.853	27.2249	30.8141	27.315	28.6283	28.6201	29.5003	27.934	29.4783	21.9599	29.759	29.1748	30.0705	30.1453	27.6458	30.0132	30.4071	30.5197	30.5118	30.1778	30.2685	29.9974	29.4979	27.145	29.5428	30.4371	29.5693	29.6541	29.7894	29.4704	29.89	28.1854	30.567	29.2525	27.8983	30.21	30.2546	31.011	30.3705	30.3711	29.9582	29.078	29.7427	29.8286	30.2373	30.0994	30.3964	30.2367	30.1336
CGNL1	23.2561					25.0232					25.0226						24.7235					24.2458	23.5297				23.7333	25.5268	25.907	27.5245		25.4645		23.5071		23.1765		26.1703	23.0638	25.346				24.501		24.7166	25.2735	24.9211	22.7753
OCLN	22.8794																25.2571	24.32	24.8236	23.7059	23.0825	24.423	24.7696		24.8091					23.9419	23.9995			24.4395		24.1713		24.3731	25.6323	24.1226	24.4056		25.1616						25.2897
SLC25A25			29.6809		28.1516	28.6244	27.4268		27.8624		27.7872	29.3908	28.958	28.5384		28.9409	28.4177	30.1276	29.9461	28.7856	28.6033	26.0811	28.6961	28.8566	29.7405	28.1634	28.1416	28.6094	27.9729		29.3315	28.6307	29.2123	28.4764	28.9106	28.4651	29.2138	28.864	29.625	29.1793	28.6701	27.8901	28.4048	27.629	29.8321	25.7877	28.1148	26.55	30.5605
SLC27A1	23.8937	20.9711	22.9484	22.5163	23.967	26.9002	26.5419	25.3843	27.5254	23.9079	27.8608	25.994	27.1938	27.5395		28.3638	28.4141	27.3931	27.7377	28.1117	26.8006	26.392	27.4082	26.9369	26.8278	27.7489	28.3079	28.408	27.6895	27.9514	27.9734		26.5742	24.9644	23.7694	28.192	27.4348	28.5761	27.3979	27.824	27.3889	27.1605	26.0948	27.3457	27.7841	27.5889	26.8178	27.9075	26.5667
SLC47A2	25.2086		25.3571				25.0055	23.8717		24.7507	24.358	25.2616	27.4445	27.187			25.3497	26.8236		25.8643			28.3625	24.7042	26.0828		26.9467	27.9214	23.7683	25.1465			24.7576	24.8723		25.4952	24.7209	23.8696	28.8507	27.7783	27.4072		24.0659		21.3743	27.0352		24.7725	27.3068
LSR
SLC43A2											25.2466						26.7475		25.1072	27.3121					24.0186	24.655							25.8834			26.5253	25.3361	27.1843	26.0833	25.8018				26.0313	24.097
SLC43A3				21.5443								21.8932																23.2598		22.4436
SLC26A10
PARD3	23.4418		24.7791			24.1336	24.4629	24.3001	24.6153	24.3909	24.7224	24.5175	25.2877	25.5759			22.949	25.9181	24.9923	24.6538	23.721		24.8898		23.7619	23.801	24.2276	24.7489		24.0781	24.1955	24.2759	23.7224			23.3162	25.0541	23.9623	25.63	24.9621	25.0015	24.4683	24.7329	24.5878		24.7002	23.6884	23.8543	22.9833
SLC16A10
SLC22A17					23.5433	25.4762	24.2446	24.782	25.5548			22.4445	24.2013	23.9369				24.4679	23.9154	24.0433	23.1516		23.5824		24.129	24.4102	24.3042	24.3108	24.2899		23.443		25.1557				23.6362						23.7056			24.3224	23.7385		24.4786
SLC44A1	24.6242		24.7997	24.7322	22.9605	28.7153	29.1579	28.8319	29.4857	25.27	29.7434	28.0616	29.6486	29.1201	24.6296	25.6285	27.2276	28.3549	28.3685	28.5304	28.5233	27.0486	27.7242	30.103	27.9196	28.4845	28.0861	28.4874	26.8482	26.8677	27.8541	27.2866	27.3541	25.7083	25.6482	27.3845	28.1649	27.9702	28.4469	27.5414	29.2976	29.5196	27.3903	28.1423	27.9925	29.0388	28.3682	28.7599	28.187
SLC7A3
ESAM																			23.8564
SLC29A1																24.2746				24.3554	24.4151					26.6891									26.1835				24.2758						25.7962		22.9422	24.5894
JAM3	26.1595	24.8402	26.4044	25.0644	25.277			25.927			26.8185	24.6356	25.7633	26.1847			26.4008			25.3426	25.0253	26.2253	24.5427	25.8121	24.6199		25.3126	25.461	25.0895	25.2429	25.6512		25.839	26.5959	24.1784	26.4317		26.8431	25.9446	26.3671	25.0146	25.1135	26.2137		25.9931		25.7355
ABCA2						27.2865	28.0737	27.729	27.9904	27.271	28.6118	27.9573	29.0284	28.7855	26.3327	28.3	28.8542	28.3864	27.8051	27.8045	26.6054	24.677	28.955	27.9362	27.7664	26.8483	28.3672	27.752		27.8445	27.2699		27.7877			29.8815	28.1325	27.828	27.2055	27.5098	29.1754	27.8569	28.4423	26.1309	27.6153	28.3683	26.7538	26.7446	27.2964
ABCB6			24.4213	22.9322	22.7559	22.9735	25.2802	26.5145	25.8908	25.3159	26.2196	27.1395	27.958	26.8448	24.0586	27.3629	28.9858	28.3836	27.6174	28.695	26.9704	25.7644	27.307	26.6939	28.592	27.7452	27.9129	26.7685	25.1438	26.3086	26.8439	26.4152	26.9464	26.5802		28.6173	27.7325	27.5321	26.4151	29.1294	27.5641	26.1775	27.0416	26.9915	27.584	24.3621	26.6588	26.7732	29.3699
ABCB8					23.6228			23.4047			24.2255	24.2714				24.3044	23.8854	23.4296	24.0002	23.4432	23.0965	23.9704	23.5595		24.3368		22.9589			22.9685	23.3372		24.2426		23.1948	25.3006	25.0387	24.2837	24.6544	24.5067	23.6874		23.4485	24.2566	23.6228	23.802	22.8113	22.525	24.8208
TJP2	21.6817		26.9394		26.0573	29.6413	30.0014	30.1229	29.9116	27.7546	30.3072	29.4797	29.888	28.7269	27.118	27.8863	28.1745	30.0001	28.7767	27.5168	28.6863		27.0136	30.4796	26.4378	28.09	26.9835	27.3278	27.9667	26.2562	27.7879		27.4364	24.9558	21.1844	27.5586	28.6534	27.869	26.0854	27.2179	29.8825	30.1231	27.8545	26.4048	29.1577	29.3791	29.9742	28.2154	27.0125
HEG1																	22.812
ABCG2			24.9306									23.534				24.096			23.2932	24.1713	24.096	24.6512	22.4669		24.8596	23.0715	25.7745	24.82	25.3859	25.1828				25.6811	24.5904										25.499		24.2631
SLC30A1				23.0391	23.8754	24.4422	24.8411		24.9887		25.1468	24.4529	24.701				24.5253	25.0946	25.4783	25.2176	24.7452	24.3647	25.3758	25.0046	24.989	24.948	23.7648	25.7641			24.5568					23.7164	25.2539	24.1092		24.7651	25.378	24.9488	24.2114	24.5372	24.5255	24.6658	24.9699	25.1507	24.9297
[truncated: 37 more columns]

## Sheet: Table S3
Table S3: Overview of all used datasets
Figure	Current/ previous study	Cohort	Numbers	Method	Tissue Source
1,S1, 2b,d,e-h	Pajtler, K. W. et al. (2015). https://doi.org:10.1016/j.ccell.2015.04.002, Roth, R. B. et al. (2006). https://doi.org:10.1007/s10048-006-0032-6	EPN and healthy RNA samples	n=225 healthy, n=364 EPN	RNA array	Human
2a,c	Cardoso-Moreira, M. et al. (2019). https://doi.org:10.1038/s41586-019-1338-5	Evodevo healthy samples	n=58 healthy cerebellum, n=53 healthy cortex	RNA array	Human
3a, S3c-g	Gojo, J. et al. (2020). https://doi.org:10.1016/j.ccell.2020.06.004	Gojo dataset	n=6 (n=3 EPN PFA, n=2 EPN ZFTA, n=1 YAP1)	10x Genomics	Human
3,S3a,b	Current study	Validation dataset	n=8 (n=3 EPN PFA, n=4 EPN ZFTA, n=1 EPN YAP1)	10x Genomics	Human
S3h-k	Aubin, R. G. et al. (2022). https://doi.org:10.1038/s41467-022-31683-9	Aubin dataset	n=10 (n=9 PFA, n=1 PFB)	Drop-seq	Human
4a-c,S4	Current study	EPN and healthy protein samples	n=5 healthy, n=81 EPN	Protein mass spectrometry	Human
5a-b, S5a	Current study	PDX samples	n=16	RNA sequencing	Mouse
5a-b	Current study	IUE samples	n=23	RNA sequencing	Mouse
5a-b	Partly published in van Tilburg, C. M. et al. (2021). https://doi.org:10.1158/2159-8290.Cd-21-0094	Patient samples	n=106	RNA sequencing	Human
